# Supplementary material
Source: Research Square preprint supplement (doi:10.21203/rs.3.rs-9046312/v1)
Supplement: Supplementary file 1 [file 7eb10621898386c1fd288b01.docx]

**Scheme 1.** Schematic illustration of the synthesis routes of (a) the phosphorus–nitrogen (P–N) reactive polyol (PMESO) derived from phytic acid, ethanolamine, and epoxidized soybean oil, and (b) the silicon-modified triazine-based charring agent. (c) Conceptual design of the P–N–Si synergistic flame-retardant system in flexible polyurethane foams.
